# Supplementary material for: Assessing long-range corrected functionals with physically-adjusted range-separated parameters for calculating the polarizability and the second hyperpolarizability of polydiacetylene and polybutatriene chains
Source: Royal Society of Chemistry journal article supplement (doi:10.1039/c4cp00105b), 2014-01-01
Supplement: c4cp00105b1.pdf [file c4cp00105b1.pdf]

## Assessing long-range corrected functionals with physically-adjusted range-separated parameter for calculating the polarizability and the second hyperpolarizability of polydiacetylene and polybutatriene chains.

Sébastien Nénon, Benoît Champagne, and Milena I. Spassova

### SUPPORTING INFORMATION

**Table S1.** Longitudinal linear polarizability and second hyperpolarizability for increasingly large PDA oligomers calculated using the 6-31G(d) basis set and different levels of approximation.

| N | LC-BLYP ( $\mu$ adj.)          | LC-BLYP ( $\mu = 0.47$ ) | CAMB3LYP | CCSD(T) |
|---|--------------------------------|--------------------------|----------|---------|
|   | $\alpha$ (a.u.)                |                          |          |         |
| 1 | 125.95                         | 122.14                   | 129.14   | 113.23  |
| 2 | 300.43                         | 275.33                   | 304.86   | 249.20  |
| 3 | 543.17                         | 463.32                   | 532.93   | 413.42  |
| 4 | 847.10                         | 670.20                   | 793.98   | 592.20  |
| 5 | 1175.71                        | 887.15                   | 1074.66  | 779.02  |
| 6 | 1544.46                        | 1109.56                  | 1366.91  | 969.96  |
|   | $\gamma$ ( $\times 10^3$ a.u.) |                          |          |         |
| 1 | 70                             | 62                       | 73       |         |
| 2 | 714                            | 536                      | 752      | 537     |
| 3 | 3262                           | 1933                     | 3216     | 1898    |
| 4 | 9823                           | 4438                     | 8552     | 4240    |
| 5 | 21220                          | 7904                     | 17093    | 7880    |
| 6 | 39486                          | 12075                    | 28506    | 12300   |

**Table S2.** Longitudinal linear polarizability and second hyperpolarizability for increasingly large PBT oligomers calculated using the 6-31G(d) basis set and different levels of approximation.

| N | LC-BLYP ( $\mu$ adj.)          | LC-BLYP ( $\mu = 0.47$ ) | CAMB3LYP | CCSD(T) |
|---|--------------------------------|--------------------------|----------|---------|
|   | $\alpha$ (a.u.)                |                          |          |         |
| 1 |                                |                          |          |         |
| 2 | 294.79                         | 290.06                   | 300.62   | 250.62  |
| 3 | 644.25                         | 604.23                   | 649.28   | 504.42  |
| 4 | 1161.14                        | 1022.02                  | 1138.72  | 833.26  |
| 5 | 1845.90                        | 1524.37                  | 1758.43  | 1225.14 |
| 6 | 2721.15                        | 2091.85                  | 2491.92  |         |
|   | $\gamma$ ( $\times 10^3$ a.u.) |                          |          |         |
| 1 |                                |                          |          |         |
| 2 | 226                            | 213                      | 198      | 355     |
| 3 | 2128                           | 1888                     | 1985     | 2429    |
| 4 | 10136                          | 8007                     | 9563     | 9090    |
| 5 | 33882                          | 22780                    | 31154    | 22800   |
| 6 | 90730                          | 50236                    | 78579    |         |

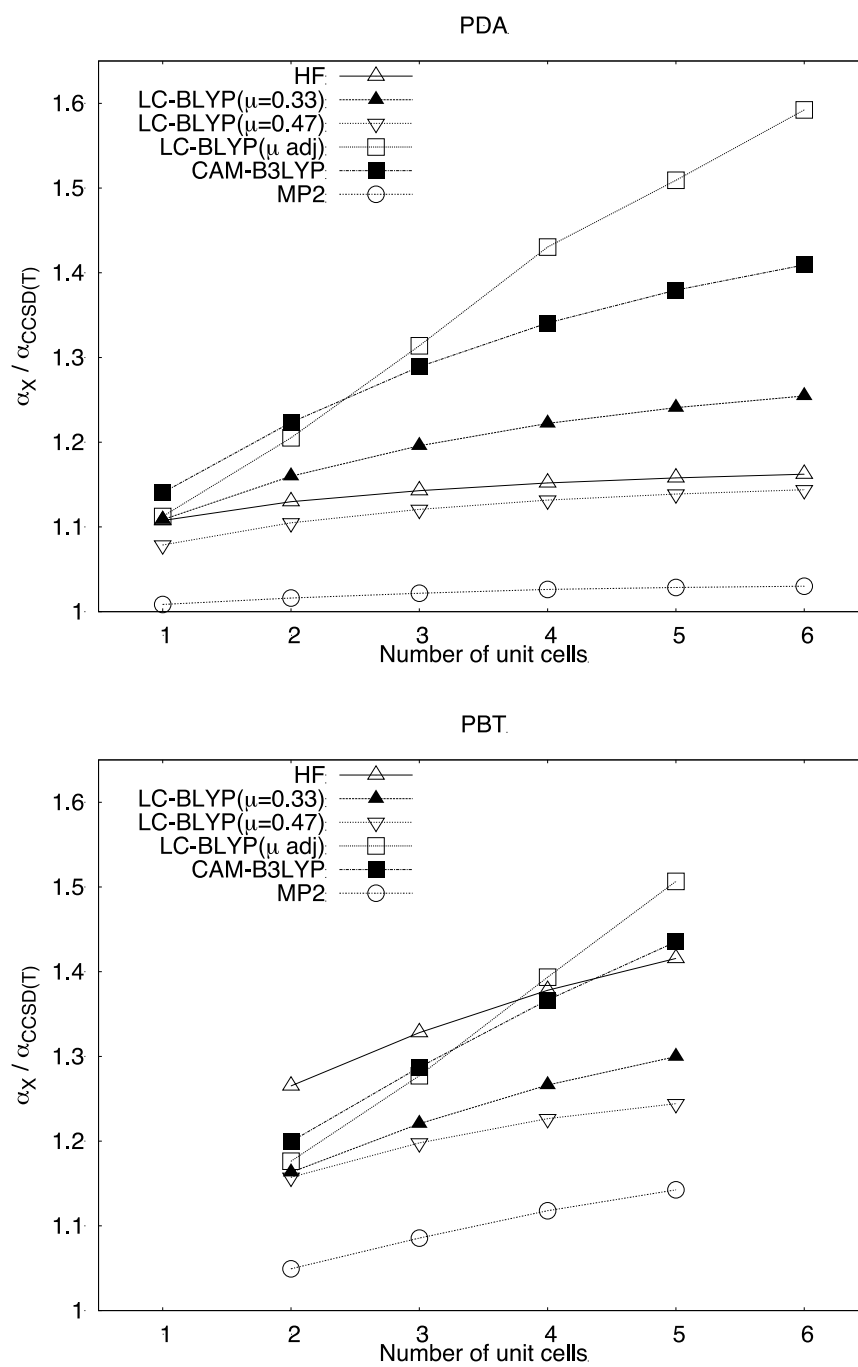

**Figure S1.** Evolution with chain length of the  $\alpha_X/\alpha_{\text{CCSD(T)}}$  ratios for PDA (top) and PBT (bottom) chains as determined from 6-31G(d) calculations.

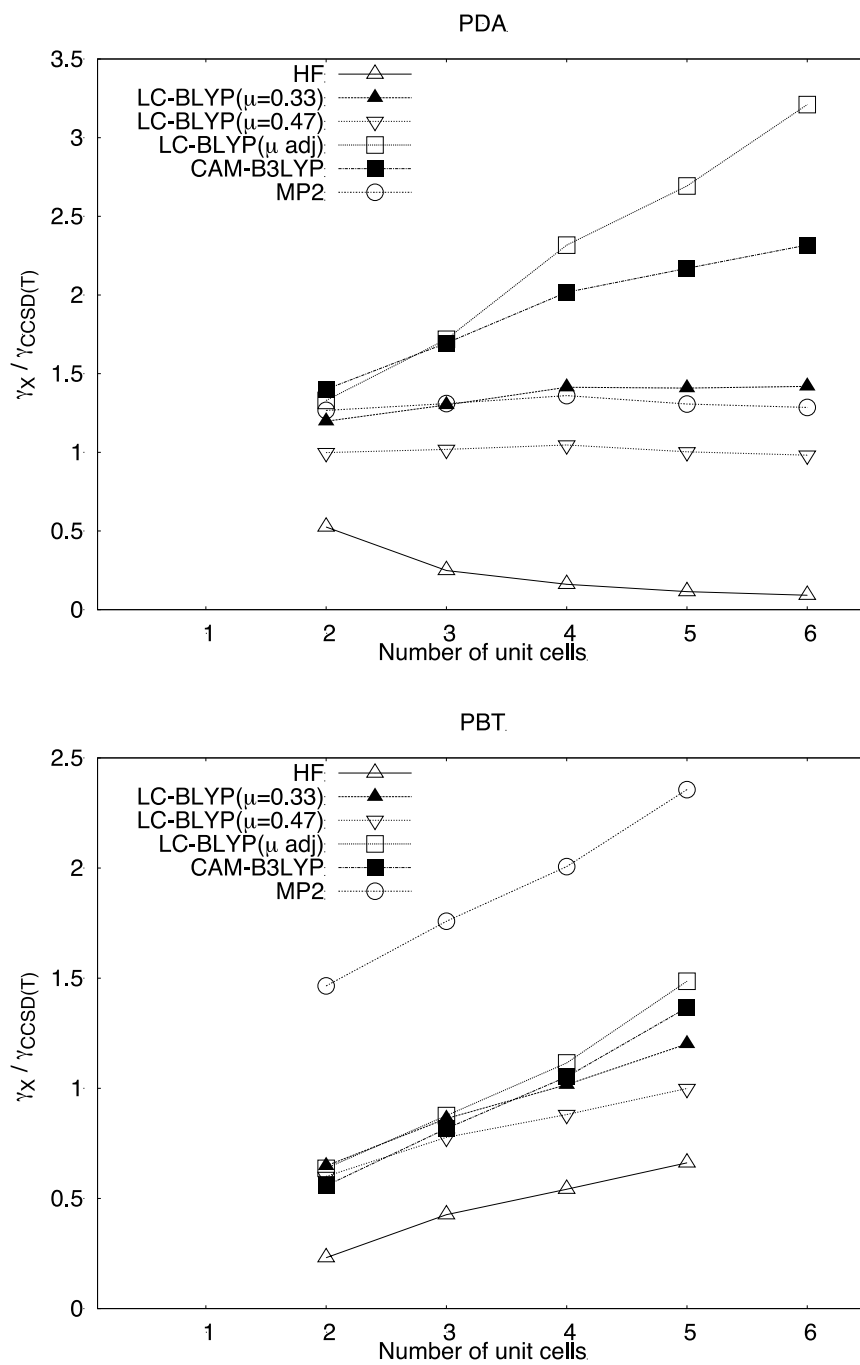

**Figure S2.** Evolution with chain length of the  $\gamma_X/\gamma_{\text{CCSD(T)}}$  ratios for PDA (top) and PBT (bottom) chains as determined from 6-31G(d) calculations.
